# Supplementary material for: Proximal Imaging of Changes in Photochemical Reflectance Index in Leaves Based on Using Pulses of Green-Yellow Light
Source: MDPI journal article supplement (doi:10.3390/rs13091762), 2021-05-01
Supplement: s1 [file s1]

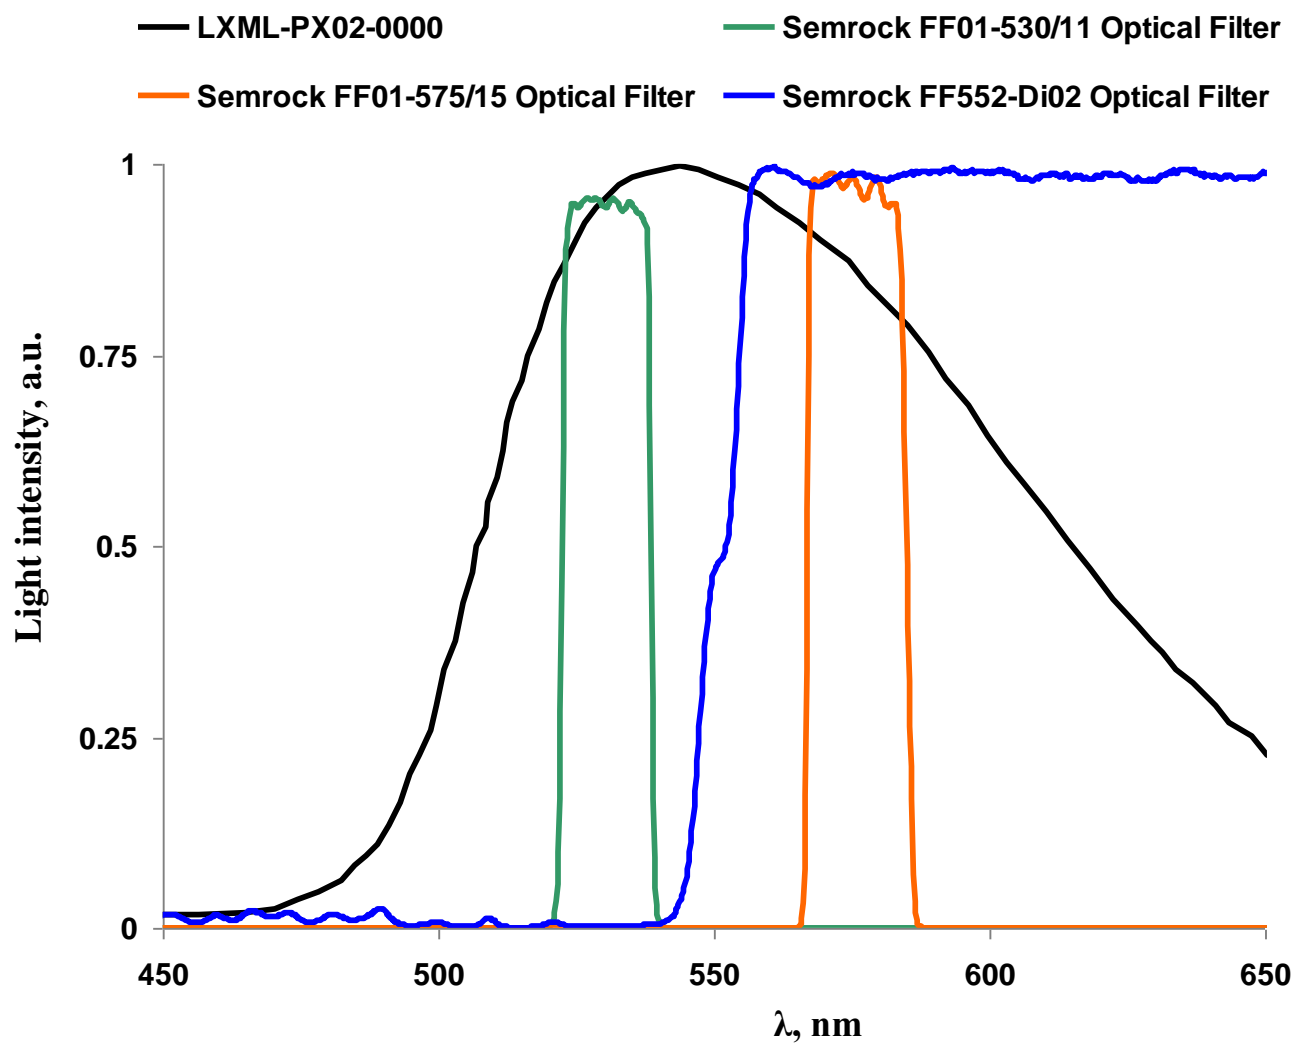

**Figure S1.** Spectrum of green-yellow light of light-emitting diodes (LEDs) LXML-PX02-0000 (Lumileds, Schipol, Netherlands) and spectra of light transmission of single-band bandpass filter FF01-530/11 (Semrock, Rochester, USA), single-band bandpass filter FF01-575/15 (Semrock), and beamsplitter FF552-Di02 (Semrock).
