# Supplementary material for: Proximal Imaging of Changes in Photochemical Reflectance Index in Leaves Based on Using Pulses of Green-Yellow Light
Source: MDPI journal article supplement (doi:10.3390/rs13091762), 2021-05-01
Supplement: s1 [file s1]

Archive with 7 entries (7 files):
- Figure S1.pdf
- Figure S2.pdf
- Figure S3.pdf
- Figure S4.pdf
- Figure S5.pdf
- Figure S6.pdf
- Figure S7.pdf
