# Supplementary material for: Proximal Imaging of Changes in Photochemical Reflectance Index in Leaves Based on Using Pulses of Green-Yellow Light
Source: MDPI journal article supplement (doi:10.3390/rs13091762), 2021-05-01
Supplement: s1 [file s1]

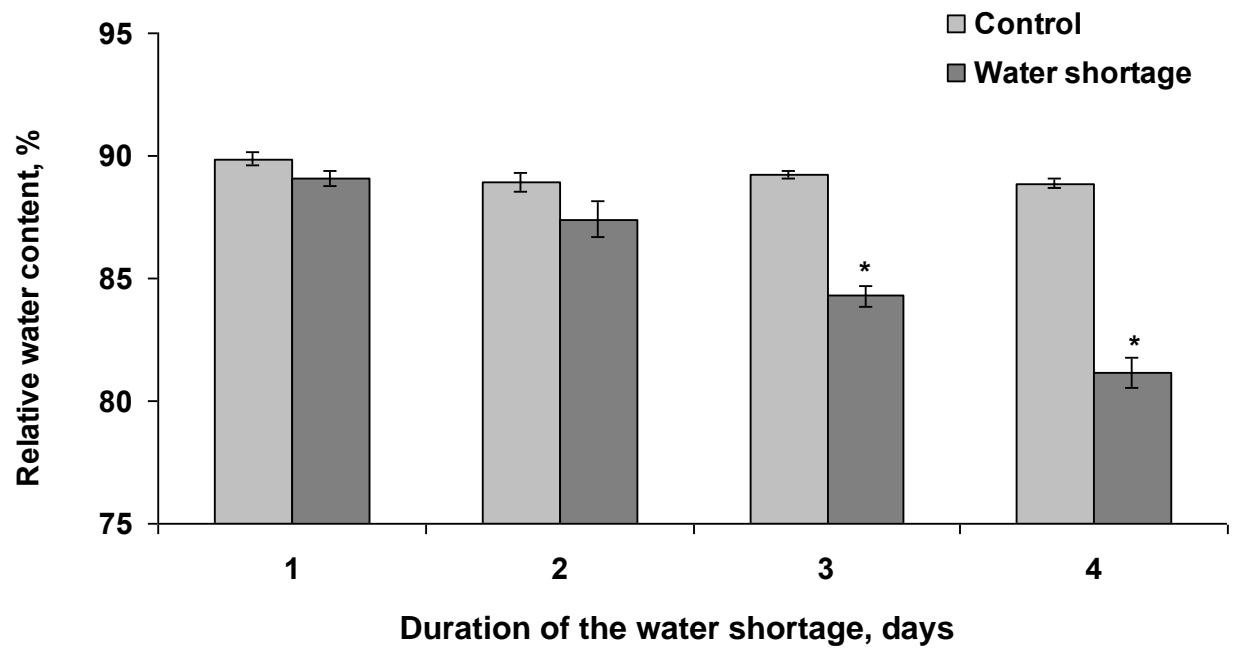

**Figure S4.** The dependence of relative water content in pea leaves on duration of water shortage ( $n=6$ ). The water shortage was induced by elimination of irrigation in experimental seedlings; control plants were irrigated every 2 days. \* indicates that experimental and control parameters were significantly differed ( $p<0.05$ ).  $n$  is number of repetitions. Bars show standard errors.
