# Supplementary material for: Proximal Imaging of Changes in Photochemical Reflectance Index in Leaves Based on Using Pulses of Green-Yellow Light
Source: MDPI journal article supplement (doi:10.3390/rs13091762), 2021-05-01
Supplement: s1 [file s1 › Figure S6.pdf]

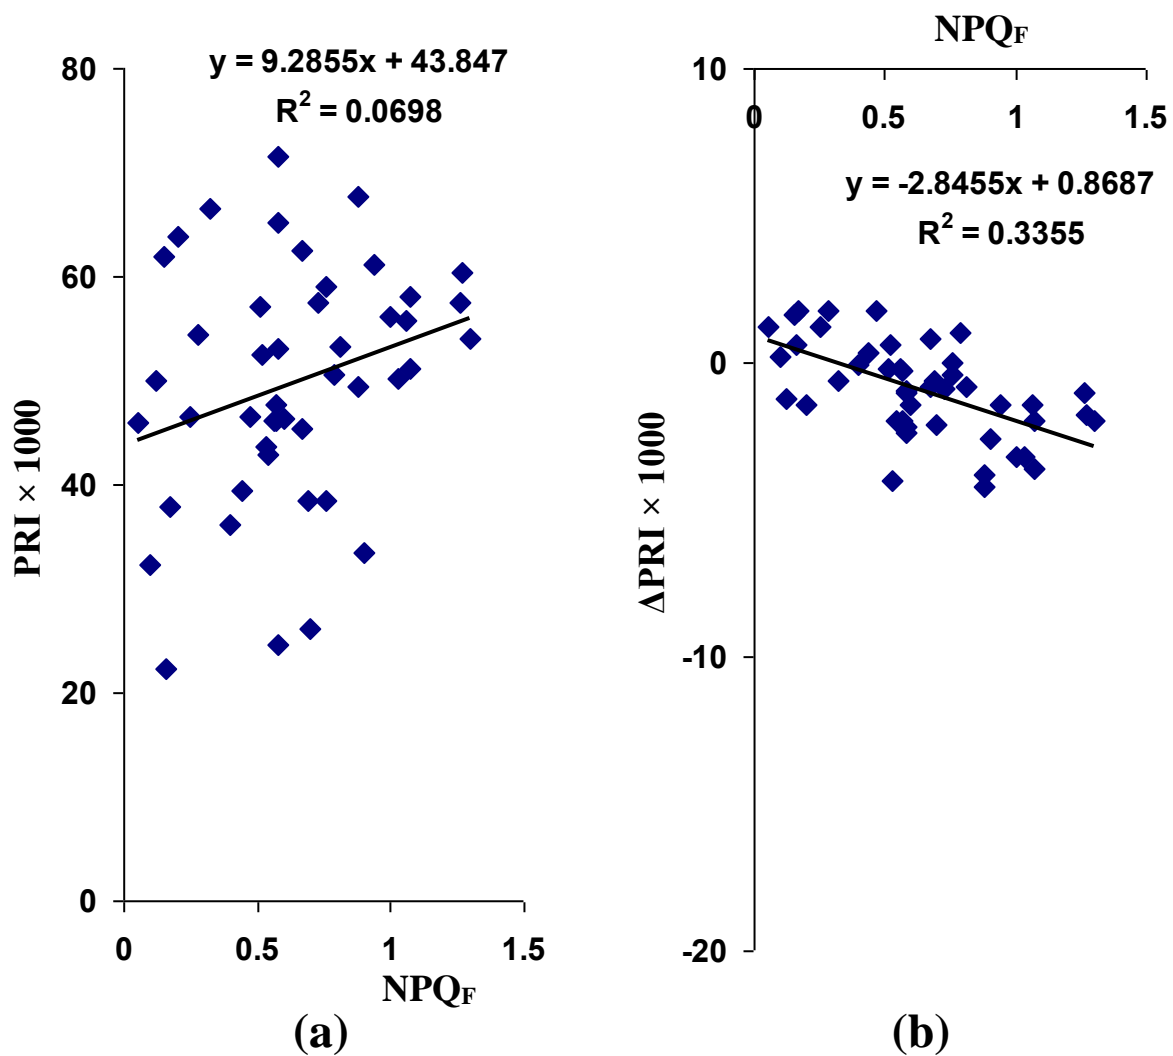

**Figure S6.** Scatter plots between  $NPQ_F$  and PRI **(a)** and between  $NPQ_F$  and  $\Delta PRI$  **(b)** in experiments with heating. Individual values of parameters were used.  $R^2$  is the determination coefficient.
